# Supplementary material for: TERT Promoter Mutations Increase Sense and Antisense Transcription from the TERT Promoter
Source: MDPI journal article supplement (doi:10.3390/biomedicines9121773), 2021-11-26
Supplement: s1 [file s1]

## Supplementary Materials

**Supplementary Table S1:** List of primers used for *TERT* promoter cloning and mutagenesis

|                  | Forward Primer               | Reverse Primer                | application | Ref |
|------------------|------------------------------|-------------------------------|-------------|-----|
| TERTpF -1822     | 5'-GAAGCTCACCCCACTCAAGTGT-3' |                               | cloning     |     |
| TERTpF -499      | 5'-CCAAAGGGTCGCCGCACGCAC-3'  |                               | cloning     | [1] |
| TERTpF -295      | 5'-CAGGCCGGGCTCCAGTGGATT-3'  |                               | cloning     |     |
| TERTpF -23       |                              | 5'-GGCTTCCCACGTGCGCAGCAGGA-3' | cloning     | [1] |
| TERTpR +81       |                              | 5'-GAACGTGGCCAGCGGCAGCACCT-3' | cloning     | [1] |
| TERTpR +359      |                              | 5'-CACTCGGGCCACCAGCTCCTT-3'   | cloning     |     |
| TERTpmut -146C>T | 5'-CGACCCTTCCGGGTCCC-3'      | 5'-GGGACCCGGGAGGGGTCTG-3'     | mutagenesis |     |
| TERTpmut -124C>T | 5'-CCCAGCCCCTCCGGGCC-3'      | 5'-GGCCCGGAAGGGGTGGG-3'       | mutagenesis |     |

**Supplementary table S2.** List of primers used for qRT-PCR and qPCR

|                    |                            |                            |     |
|--------------------|----------------------------|----------------------------|-----|
| <b>IncRNATAPAS</b> | 5'-TGAGCAACCACCCCAAATCT-3' | 5'-TTTCCCACCTTTCTCGACG-3'  | [2] |
| <b>GAPDH</b>       | 5'-GAAGGTGAAGTCGGAGTC-3'   | 5'-GAAGATGGTGATGGGATTTC-3' |     |

1. Renaud S, Bosman FT, Benhattar J. Implication of the exon region in the regulation of the human telomerase reverse transcriptase gene promoter. *Biochem Biophys Res Commun*. 2003;300(1):47-54. Epub 2002/12/14. PubMed PMID: 12480519.
2. Malhotra S, Freeberg MA, Winans SJ, Taylor J, Beemon KL. A Novel Long Non-Coding RNA in the hTERT Promoter Region Regulates hTERT Expression. *Noncoding RNA*. 2017;4(1). Epub 2018/04/17. doi: 10.3390/ncrna4010001. PubMed PMID: 29657298; PubMed Central PMCID: PMC5890388.

**Supplementary Figure S1.** *TERT* promoter-driven transcription in T98G and U87 GBM cell lines

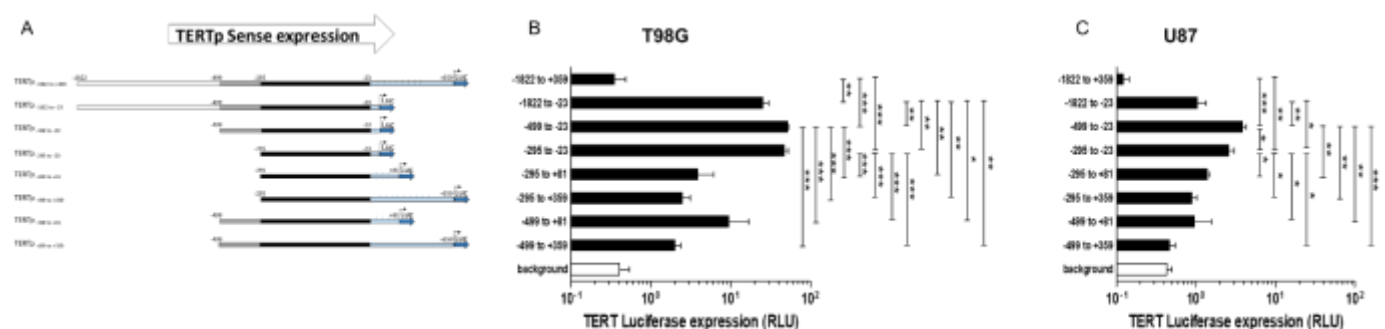

**A. Schematic representation of the TERTp-luciferase reporter plasmids in sense orientation. B and C. *TERT* promoter-driven luciferase expression in T98G (B) and U87 (C) cells.** T98G (8x10<sup>4</sup> cells/well) or U87 (5x10<sup>4</sup> cells/well) were seeded in a 48-well plate and transfected with 400 ng of each of the TERTp-luciferase vectors + 100 HSV-TK-Renilla-luciferase for normalization. Cells were lysed 48 hours post transfection and Firefly- and Renilla-Luciferase activities were measured. Firefly-Luciferase RLU was normalized to Renilla-Luciferase RLU. Results are the mean of 2 independent experiments carried out in duplicate wells. Error bars represent standard error. Differences were compared using a one-way ANOVA followed by a Newman-Keuls post-hoc test for pairwise comparisons. \* indicates p<0.05, \*\* indicates p<0.01, \*\*\* indicates p<0.001.
